# Supplementary material
Source: Royal Society of Chemistry journal article supplement (doi:10.1039/d6cp00094k)
Supplement: d6cp00094k1.pdf [file d6cp00094k1.pdf]

**Adsorption of Toxic Gases by Transition Metal Doped  $Ti_2CO_2$  MXene: A DFT study**

Wenjin Miao, Jinyi Li, Ruiying Zhang, Lin Yu, Lingyu Meng, Jingyi Zhang, Yiyao Ma,  
Lingxia Jin\* Xiaohui Ji \*

*Shaanxi Key Laboratory of Catalysis, School of Chemical & Environment Science, Shaanxi  
University of Technology, Hanzhong 723001*

---

\*Corresponding authors. Tel: +86-916-2641660; e-mail: [jinlx@snut.edu.cn](mailto:jinlx@snut.edu.cn) (L.X. Jin); [jixiaohui@snut.edu.cn](mailto:jixiaohui@snut.edu.cn) (X.H. Ji)

†Electronic supplementary information (ESI) available:

**Fig. S1** presents the band structures of pristine  $\text{Ti}_2\text{CO}_2$  and vacancy-defective  $\text{Ti}_2\text{O}_2$  after the adsorption of four gas molecules: (a) CO, (b) NO, (c)  $\text{SO}_2$ , and (d) HF.

**Fig. S2** shows the adsorption configurations of four gas molecules on the Fe-doped system: (a) CO, (b) NO, (c)  $\text{SO}_2$ , and (d) HF, including both top and side views.

**Fig. S3** shows the density of states (PDOS) of the Fe-doped adsorption systems: (a) CO, (b) NO, (c)  $\text{SO}_2$ , (d) HF.

**Fig. S4** shows the charge density difference (CDD) diagrams of the Fe-doped system: (a) CO, (b) NO, (c)  $\text{SO}_2$ , and (d) HF.

**Fig. S5** shows the adsorption configurations of four gas molecules on the Co-doped system: (a) CO, (b) NO, (c)  $\text{SO}_2$ , and (d) HF, including both top and side views.

**Fig. S6** shows the band structure diagrams of the Co-doped system: (a) CO, (b) NO, (c)  $\text{SO}_2$ , and (d) HF.

**Fig. S7** shows the density of states (PDOS) of the Co-doped adsorption systems: (a) CO, (b) NO, (c)  $\text{SO}_2$ , (d) HF.

**Fig. S8** shows the charge density difference (CDD) diagrams of the Co-doped system: (a) CO, (b) NO, (c)  $\text{SO}_2$ , and (d) HF.

**Fig. S9** shows the adsorption configurations of four gas molecules on the Ni-doped system: (a) CO, (b) NO, (c)  $\text{SO}_2$ , and (d) HF, including both top and side views.

**Fig. S10** shows the band structure diagrams of the Ni-doped system: (a) CO, (b) NO, (c)  $\text{SO}_2$ , and (d) HF.

**Fig. S11** shows the charge density difference (CDD) diagrams of the Ni-doped system: (a) CO, (b) NO, (c)  $\text{SO}_2$ , and (d) HF.

**Fig. S12** shows the density of states (PDOS) of the Ni-doped adsorption systems: (a) CO, (b) NO, (c)  $\text{SO}_2$ , (d) HF.

**Table S1** Abbreviations and Corresponding terminology.

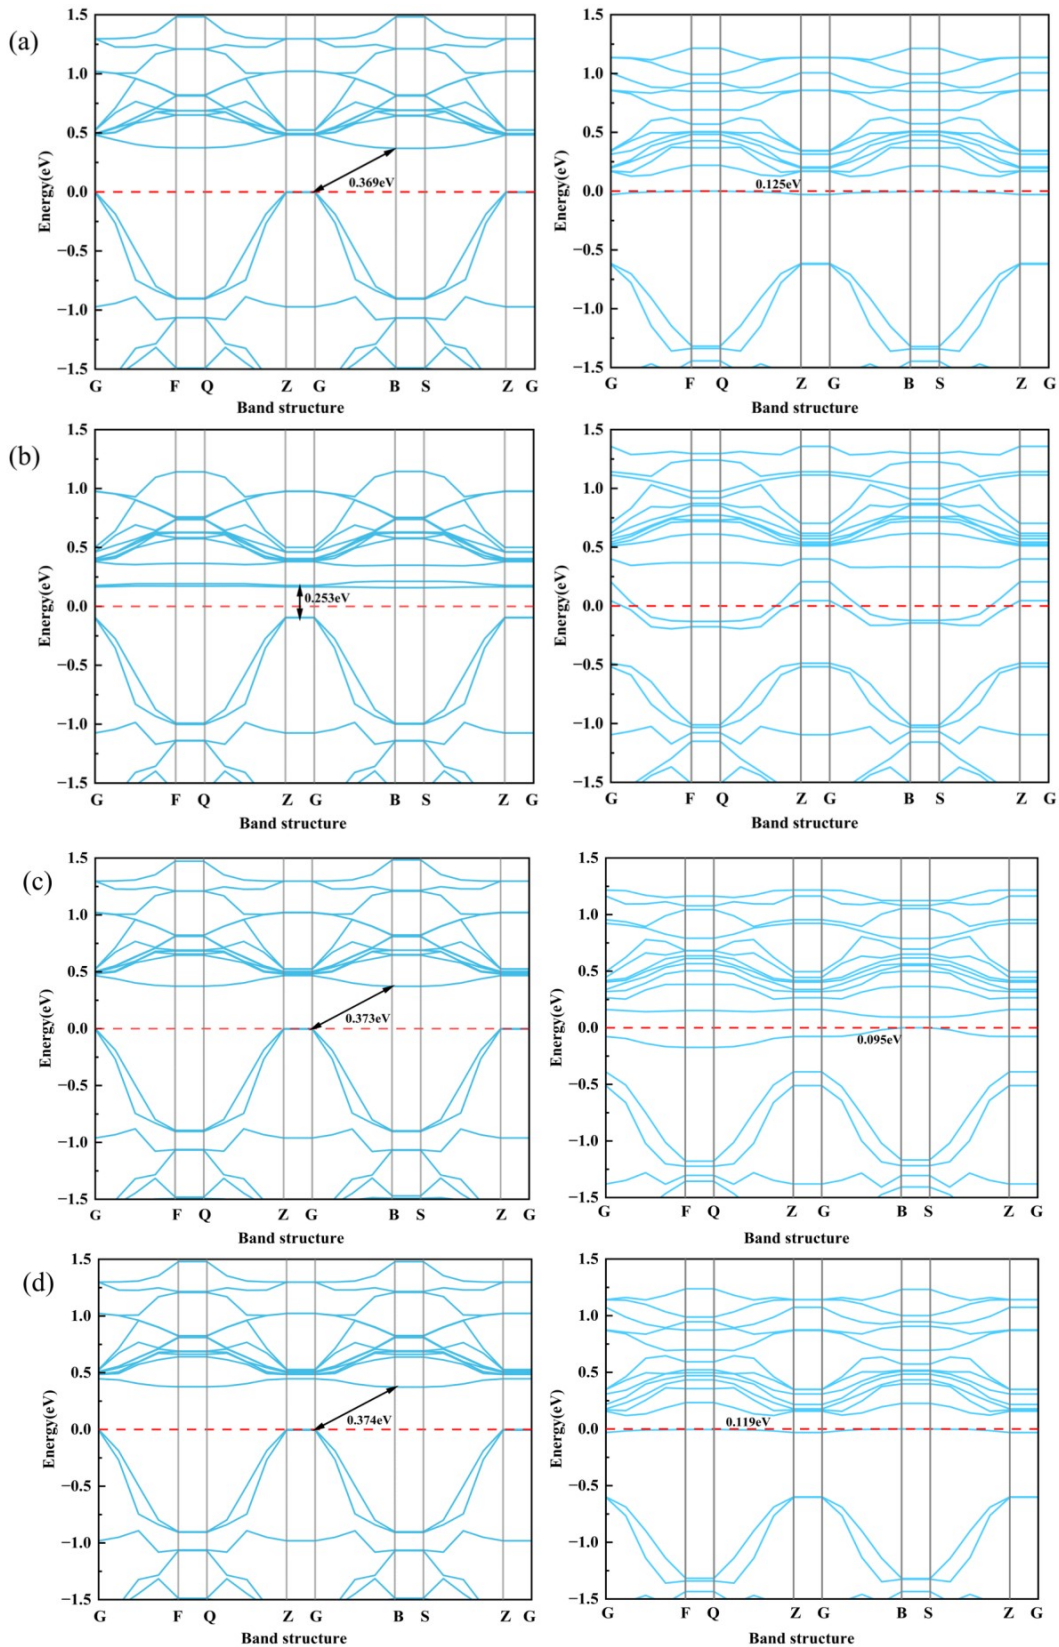

**Fig. S1** shows the band structure diagrams of pristine  $\text{Ti}_2\text{CO}_2$  and  $\text{V-Ti}_2\text{CO}_2$  after the adsorption of CO, NO,  $\text{SO}_2$  and HF: (a)  $\text{Ti}_2\text{CO}_2\text{-CO}$ ,  $\text{VTi}_2\text{CO}_2\text{-CO}$ ; (b)  $\text{Ti}_2\text{CO}_2\text{-NO}$ ,  $\text{VTi}_2\text{CO}_2\text{-NO}$ ; (c)  $\text{Ti}_2\text{CO}_2\text{-SO}_2$ ,  $\text{V-Ti}_2\text{CO}_2\text{-SO}_2$ ; (d)  $\text{Ti}_2\text{CO}_2\text{-HF}$ ,  $\text{VTi}_2\text{CO}_2\text{-HF}$

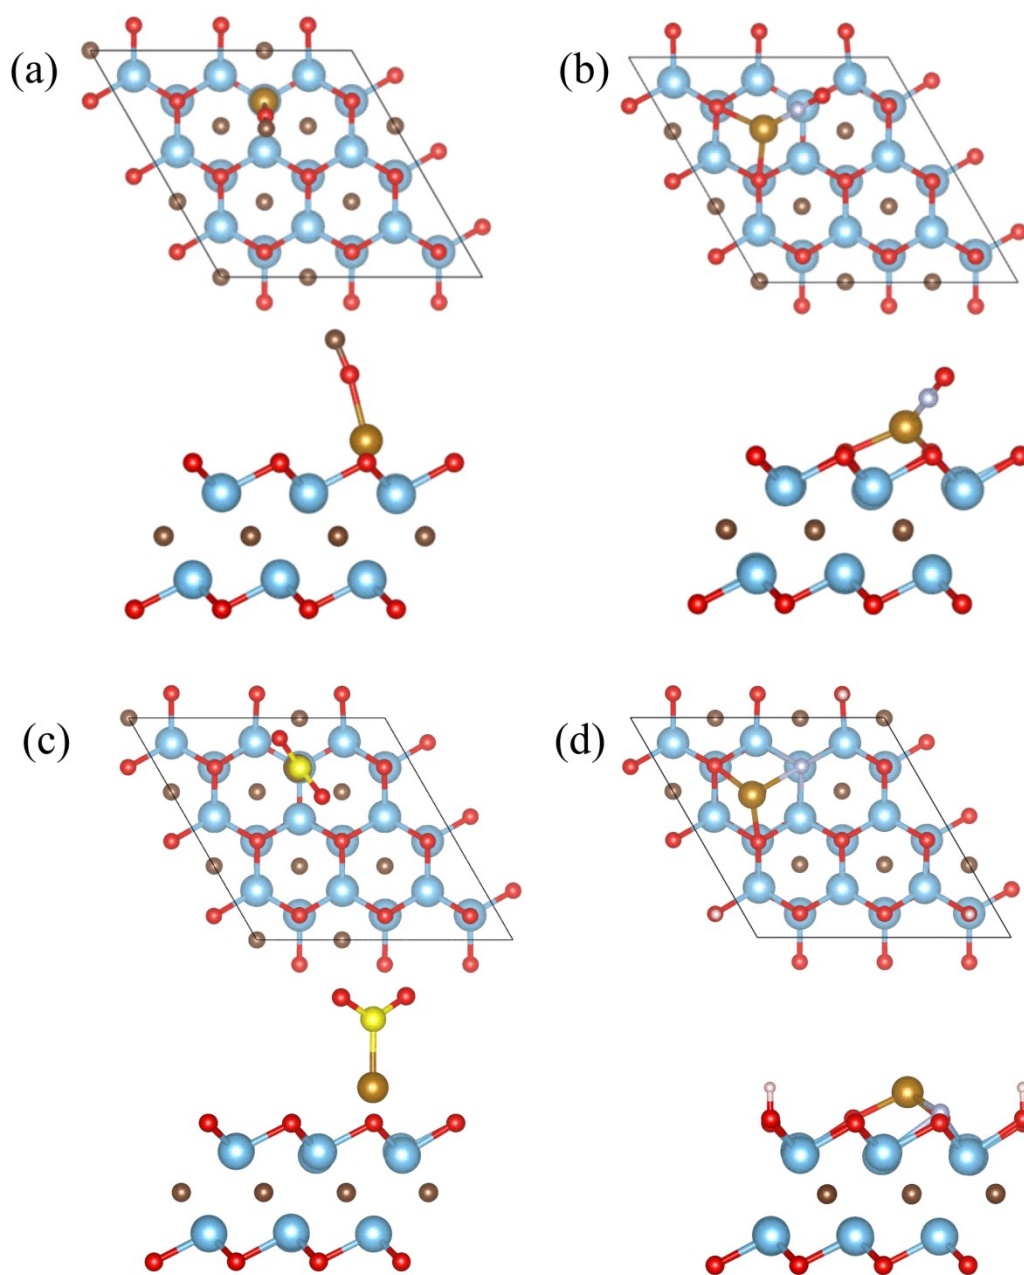

**Fig. S2** shows the optimized structures of (a) CO/Fe-Ti<sub>2</sub>CO<sub>2</sub>, (b) NO/Fe-Ti<sub>2</sub>CO<sub>2</sub>, (c) SO<sub>2</sub>/Fe-Ti<sub>2</sub>CO<sub>2</sub> and (d) HF/Fe-Ti<sub>2</sub>CO<sub>2</sub>

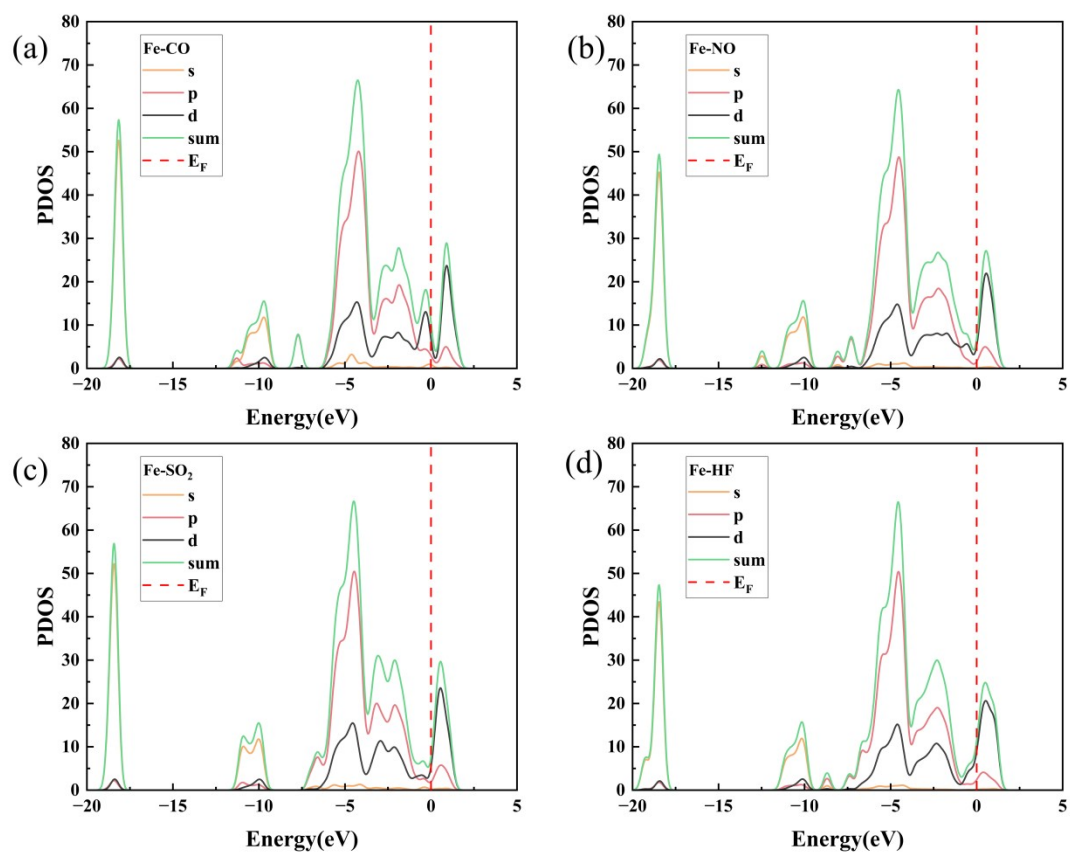

**Fig. S3** shows the density of states (PDOS) of the Fe-doped adsorption systems: (a) CO/Fe-Ti<sub>2</sub>CO<sub>2</sub>, (b) NO/Fe-Ti<sub>2</sub>CO<sub>2</sub>, (c) SO<sub>2</sub>/Fe-Ti<sub>2</sub>CO<sub>2</sub>, (d) HF/Fe-Ti<sub>2</sub>CO<sub>2</sub>

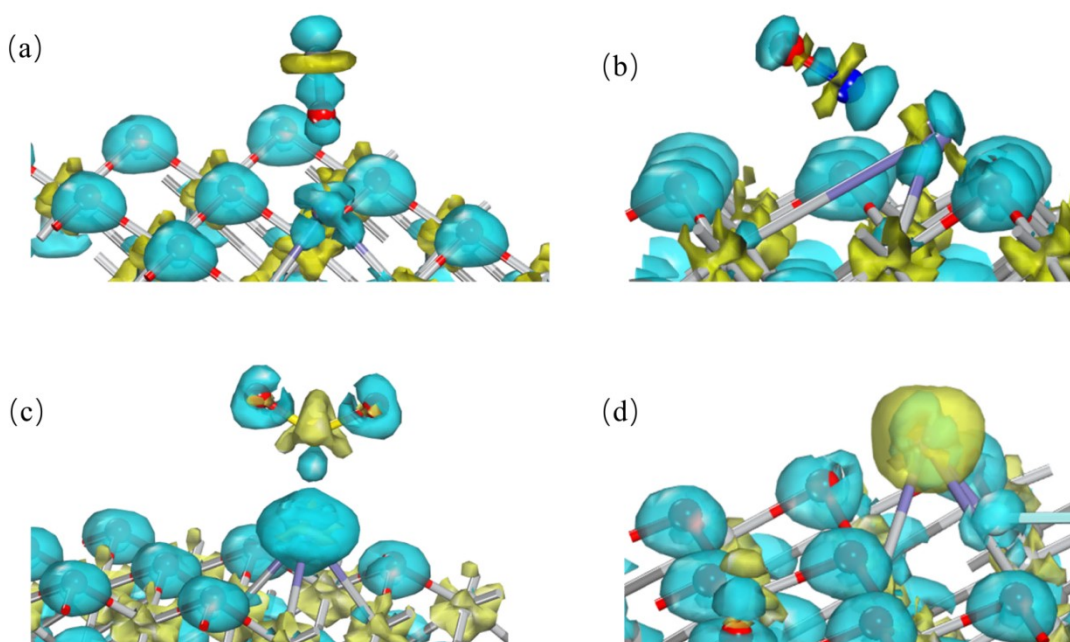

**Fig. S4** shows the charge density difference (CDD) of the Fe-doped system: (a) CO/Fe-Ti<sub>2</sub>CO<sub>2</sub>, (b) NO/Fe-Ti<sub>2</sub>CO<sub>2</sub>, (c)SO<sub>2</sub>/Fe-Ti<sub>2</sub>CO<sub>2</sub>, (d)HF/Fe-Ti<sub>2</sub>CO<sub>2</sub>

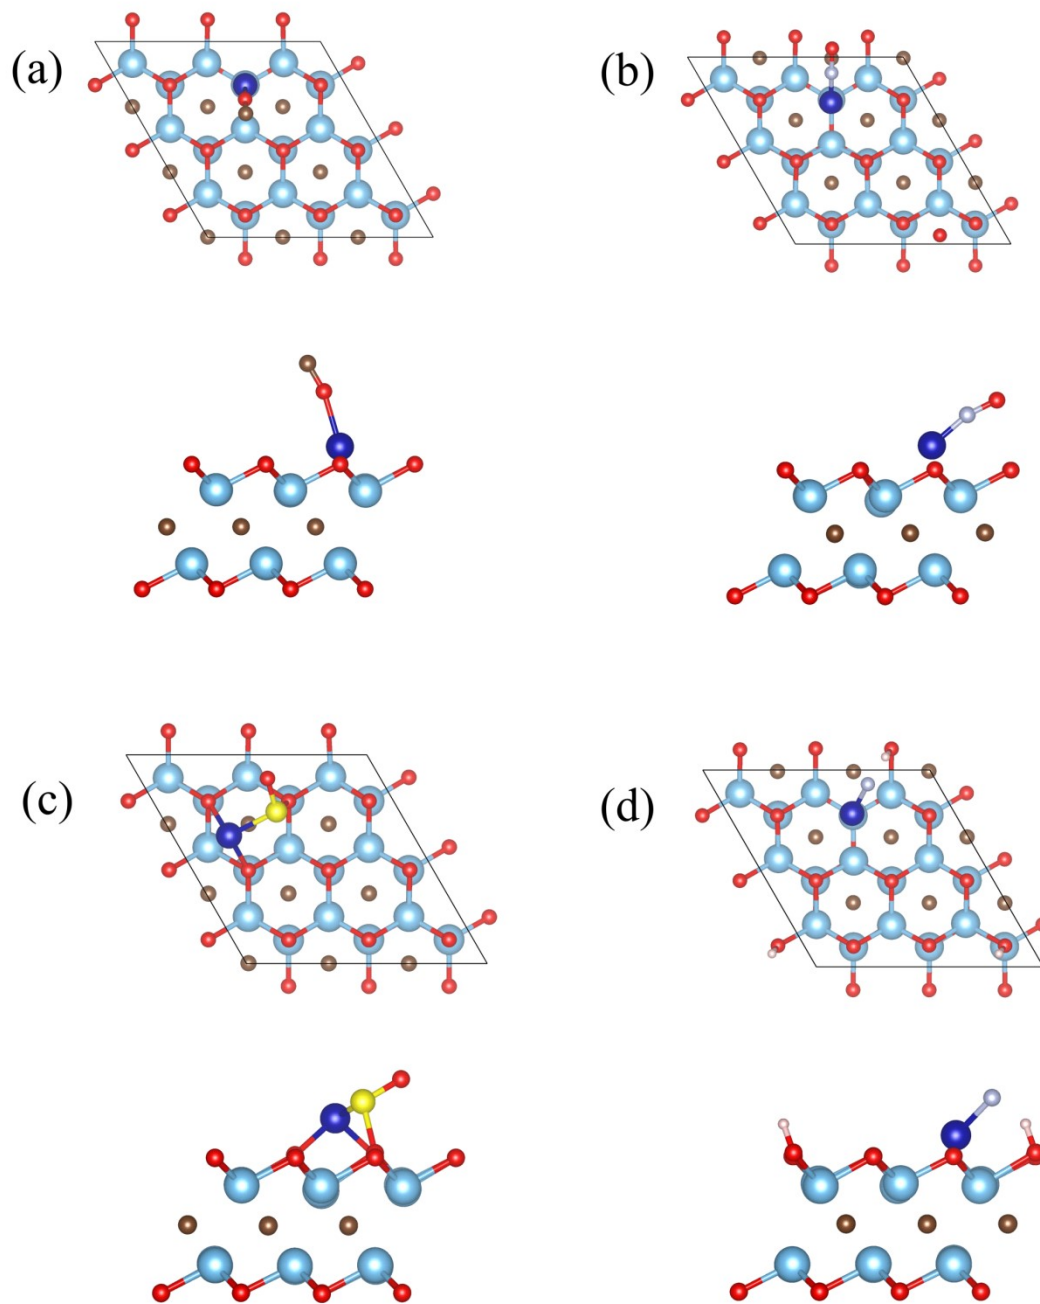

**Fig. S5** shows the optimized structures of (a) CO/Co-Ti<sub>2</sub>CO<sub>2</sub>, (b) NO/Co-Ti<sub>2</sub>CO<sub>2</sub>, (c) SO<sub>2</sub>/Co-Ti<sub>2</sub>CO<sub>2</sub> and (d) HF/Co-Ti<sub>2</sub>CO<sub>2</sub>.

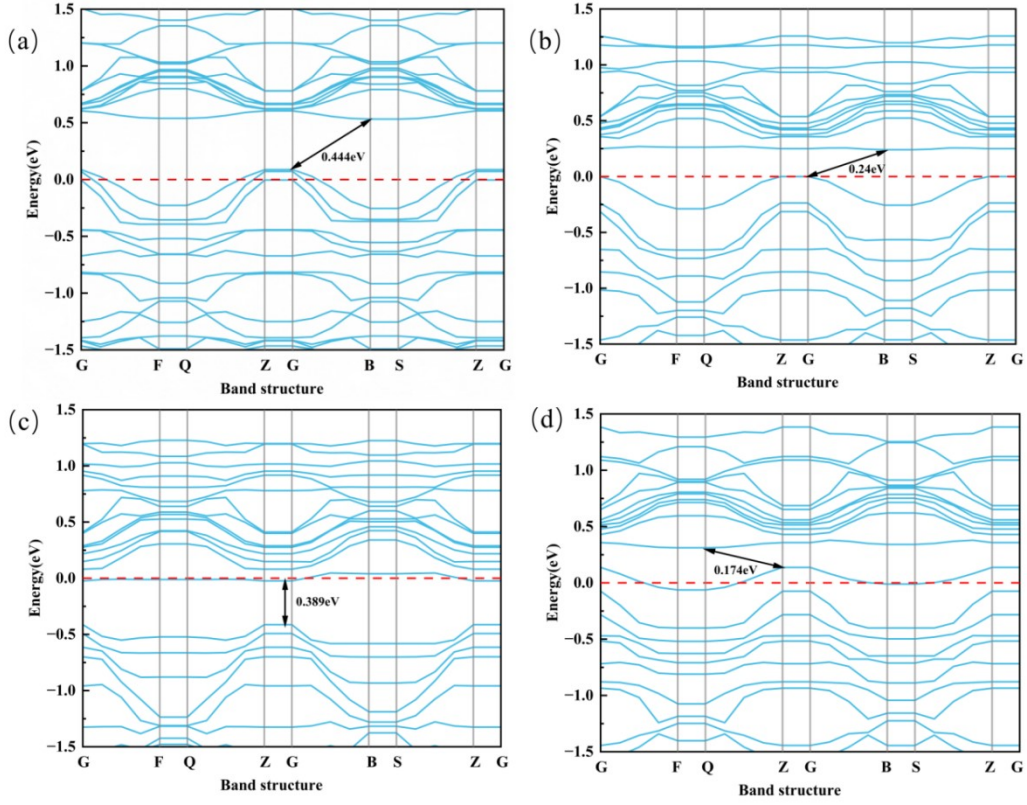

**Fig. S6** shows the band structure diagrams of the Co-doped system: (a) CO/Co-Ti<sub>2</sub>CO<sub>2</sub>, (b) NO/Co-Ti<sub>2</sub>CO<sub>2</sub>, (c) SO<sub>2</sub>/Co-Ti<sub>2</sub>CO<sub>2</sub> and (d) HF/Co-Ti<sub>2</sub>CO<sub>2</sub>.

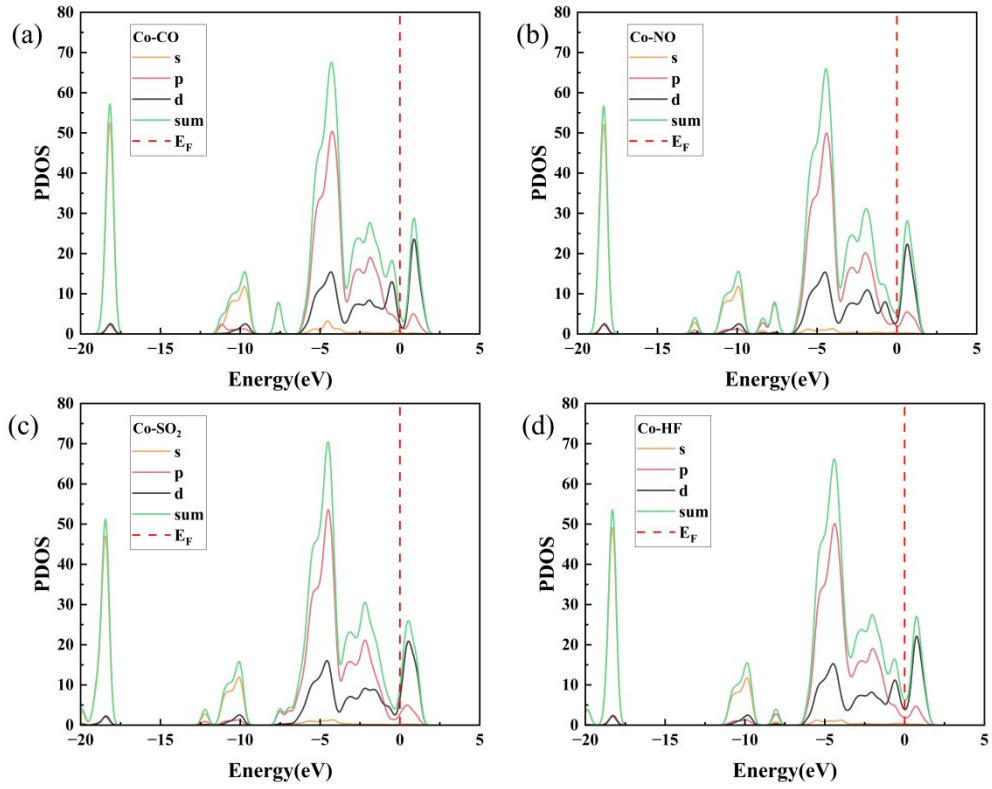

**Fig. S7** shows the density of states (PDOS) of the Co-doped adsorption systems: (a) CO/Co-Ti<sub>2</sub>CO<sub>2</sub>, (b) NO/Co-Ti<sub>2</sub>CO<sub>2</sub>, (c) SO<sub>2</sub>/Co-Ti<sub>2</sub>CO<sub>2</sub>, (d) HF/Co-Ti<sub>2</sub>CO<sub>2</sub>

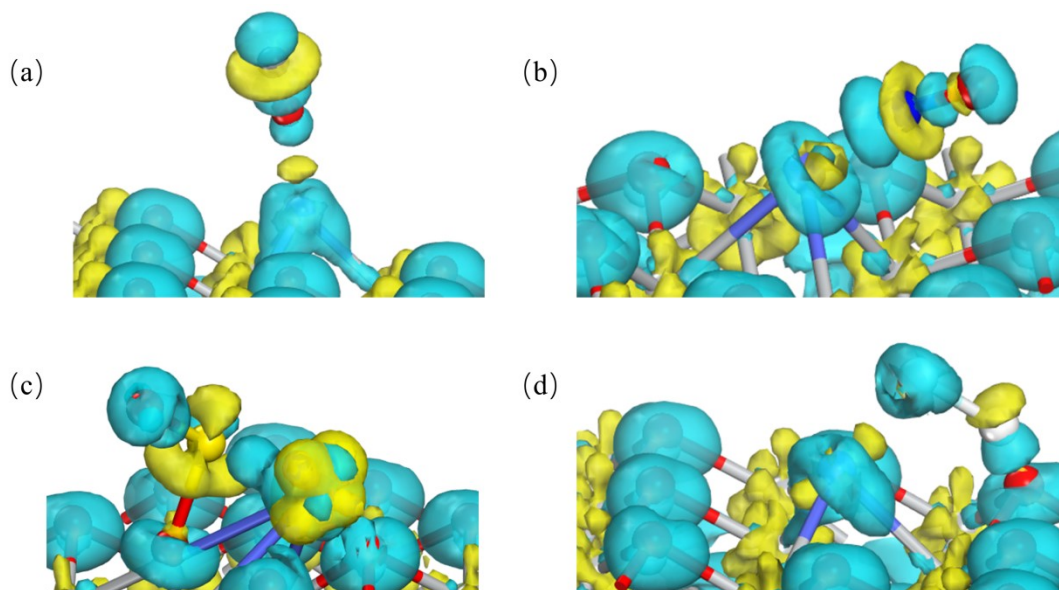

**Fig. S8** shows the charge density difference (CDD) diagrams of the Co-doped system: (a) CO/Co-Ti<sub>2</sub>CO<sub>2</sub>, (b) NO/Co-Ti<sub>2</sub>CO<sub>2</sub>, (c) SO<sub>2</sub>/Co-Ti<sub>2</sub>CO<sub>2</sub> and (d) HF/Co-Ti<sub>2</sub>CO<sub>2</sub>.

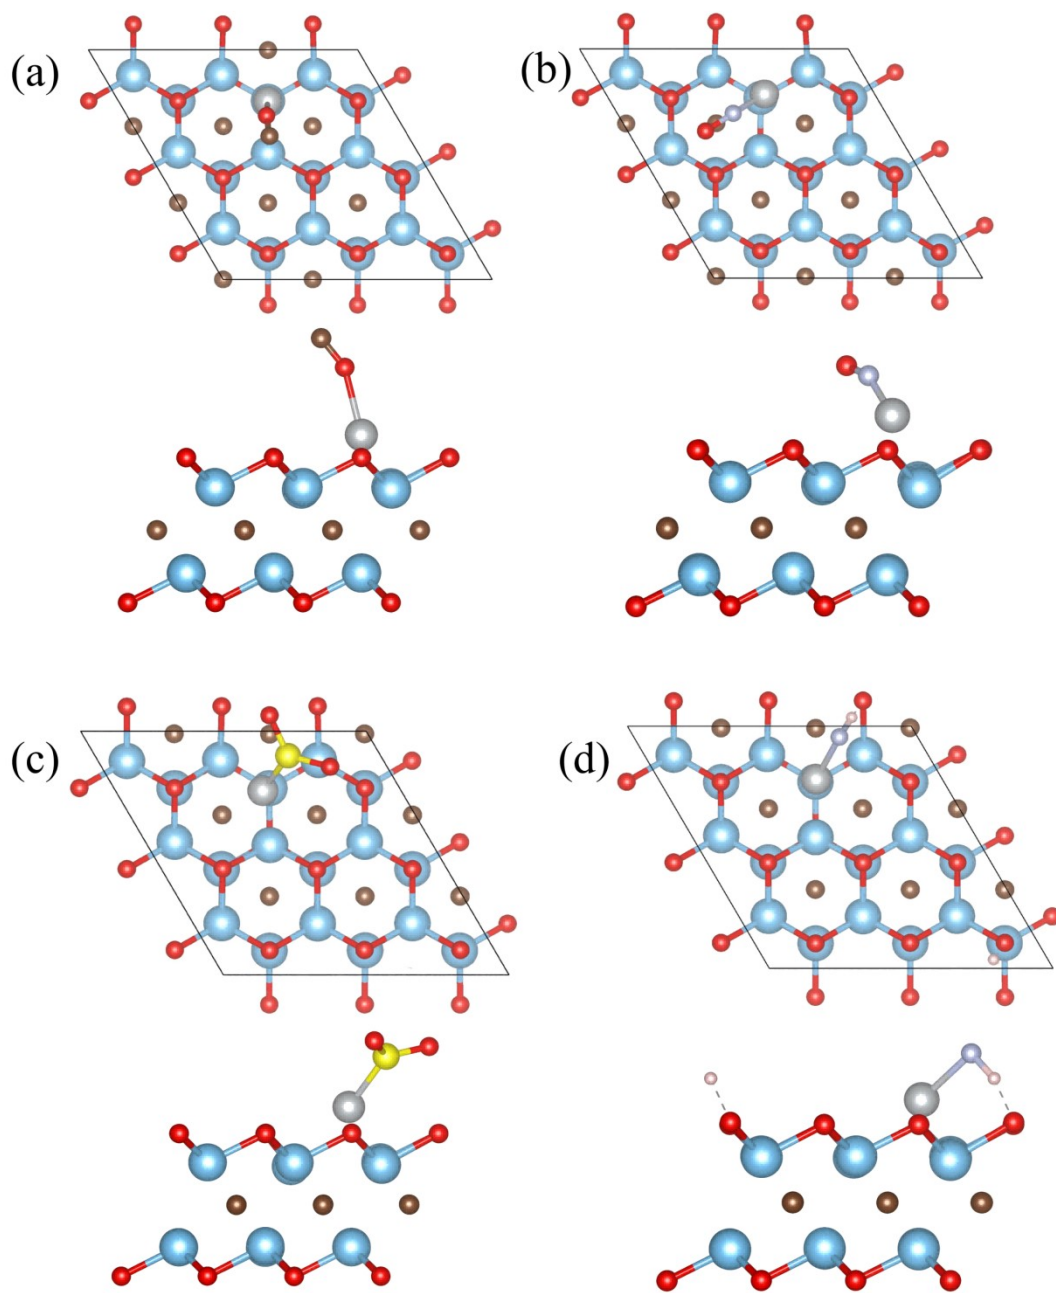

**Fig. S9** shows the optimized structures of (a) CO/Ni-Ti<sub>2</sub>CO<sub>2</sub>, (b) NO/Ni-Ti<sub>2</sub>CO<sub>2</sub>, (c) SO<sub>2</sub>/Ni-Ti<sub>2</sub>CO<sub>2</sub> and (d) HF/Ni-Ti<sub>2</sub>CO<sub>2</sub>.

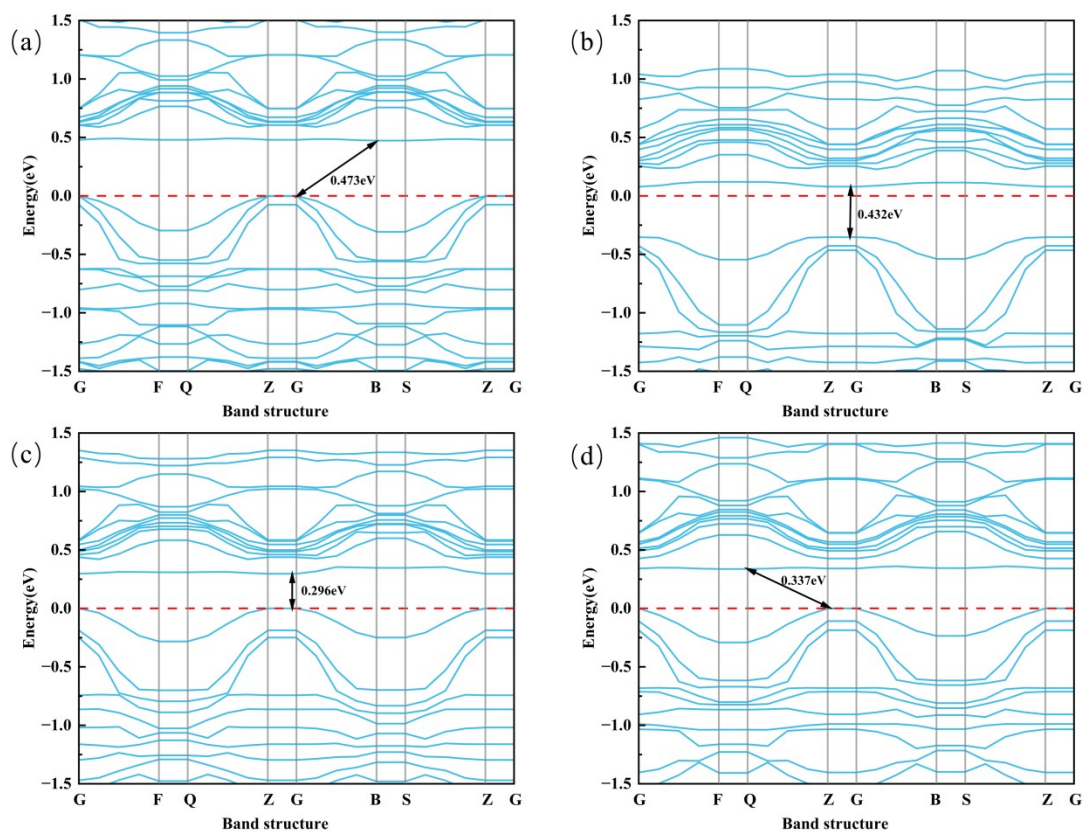

**Fig. S10** shows the band structure diagrams of the Ni-doped system: (a) CO/Ni-Ti<sub>2</sub>CO<sub>2</sub>, (b) NO/Ni-Ti<sub>2</sub>CO<sub>2</sub>, (c) SO<sub>2</sub>/Ni-Ti<sub>2</sub>CO<sub>2</sub> and (d) HF/Ni-Ti<sub>2</sub>CO<sub>2</sub>.

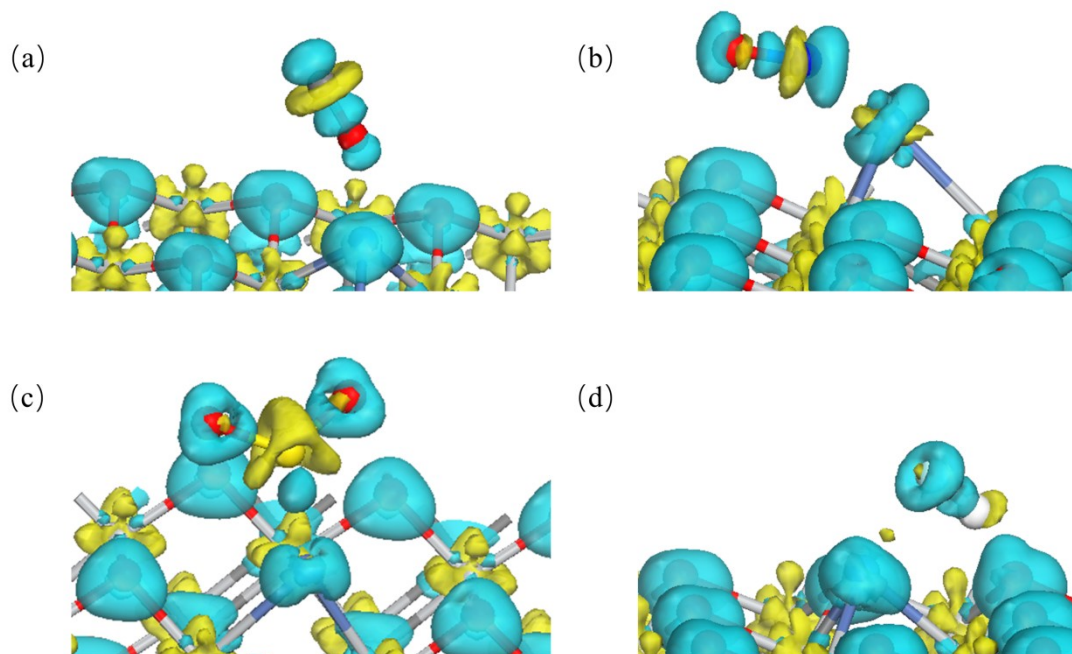

**Fig. S11** shows the charge density difference (CDD) diagrams of the Ni-doped system: (a) CO/Ni-Ti<sub>2</sub>CO<sub>2</sub>, (b) NO/Ni-Ti<sub>2</sub>CO<sub>2</sub>, (c) SO<sub>2</sub>/Ni-Ti<sub>2</sub>CO<sub>2</sub> and (d) HF/Ni-Ti<sub>2</sub>CO<sub>2</sub>.

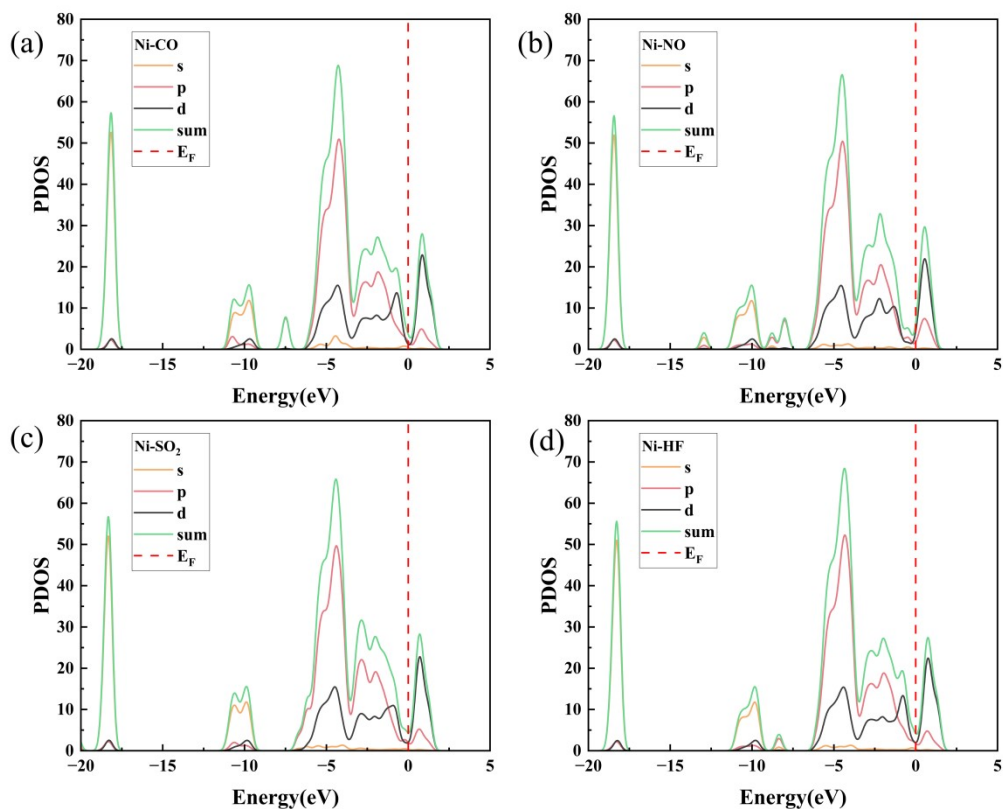

**Fig. S12** shows the density of states (PDOS) of the Ni-doped adsorption systems: (a) CO/Ni-Ti<sub>2</sub>CO<sub>2</sub>, (b) NO/Ni-Ti<sub>2</sub>CO<sub>2</sub>, (c) SO<sub>2</sub>/Ni-Ti<sub>2</sub>CO<sub>2</sub>, (d) HF/Ni-Ti<sub>2</sub>CO<sub>2</sub>.

**Table S1** Abbreviations and Corresponding terminology

| Abbreviations                      | Corresponding terminology                              |
|------------------------------------|--------------------------------------------------------|
| Ti <sub>2</sub> CO <sub>2</sub>    | Oxygen-terminated titanium carbide MXene               |
| TM-Ti <sub>2</sub> CO <sub>2</sub> | Transition metal-doped Ti <sub>2</sub> CO <sub>2</sub> |
| Fe-Ti <sub>2</sub> CO <sub>2</sub> | Fe-doped Ti <sub>2</sub> CO <sub>2</sub>               |
| Co-Ti <sub>2</sub> CO <sub>2</sub> | Co-doped Ti <sub>2</sub> CO <sub>2</sub>               |
| Ni-Ti <sub>2</sub> CO <sub>2</sub> | Ni-doped Ti <sub>2</sub> CO <sub>2</sub>               |
| VTi <sub>2</sub> CO <sub>2</sub>   | O-vacancy structures                                   |
| CO                                 | Carbon monoxide                                        |
| NO                                 | Nitric oxide                                           |
| SO <sub>2</sub>                    | Sulfur dioxide                                         |
| HF                                 | Hydrogen fluoride                                      |
| 2D                                 | Two-dimensional                                        |
| PDOS                               | Partial density of states                              |
| TDOS                               | Total density of states                                |
| CDD                                | Charge differential density                            |

|      |                                    |
|------|------------------------------------|
| CBM  | Conduction band minimum            |
| VBM  | Valence band maximum               |
| DFT  | Density functional theory          |
| GGA  | Generalized gradient approximation |
| PBE  | Perdew-Burke-Ernzerhof             |
| DNP  | Polarized double numerica          |
| BSSE | Basis Set Superposition Error      |
| SCF  | Self-consistent field              |
